# Supplementary material
Source: PubMed Central journal article supplement (PMC7773399)
Supplement: jci-131-133371-s350.pdf [file jci-131-133371-s350.pdf]

**Supplemental Figure 1.** Quantification of acylcarnitine levels in humans and germ-free mice. (A) Acylcarnitine levels in human plasma and fecal material, n=5. (B) Fecal acylcarnitine levels in conventionally-housed and germ-free mice n=4. Mean±SEM, \*p<0.05, \*\*p<0.01, \*\*\*p<0.001.

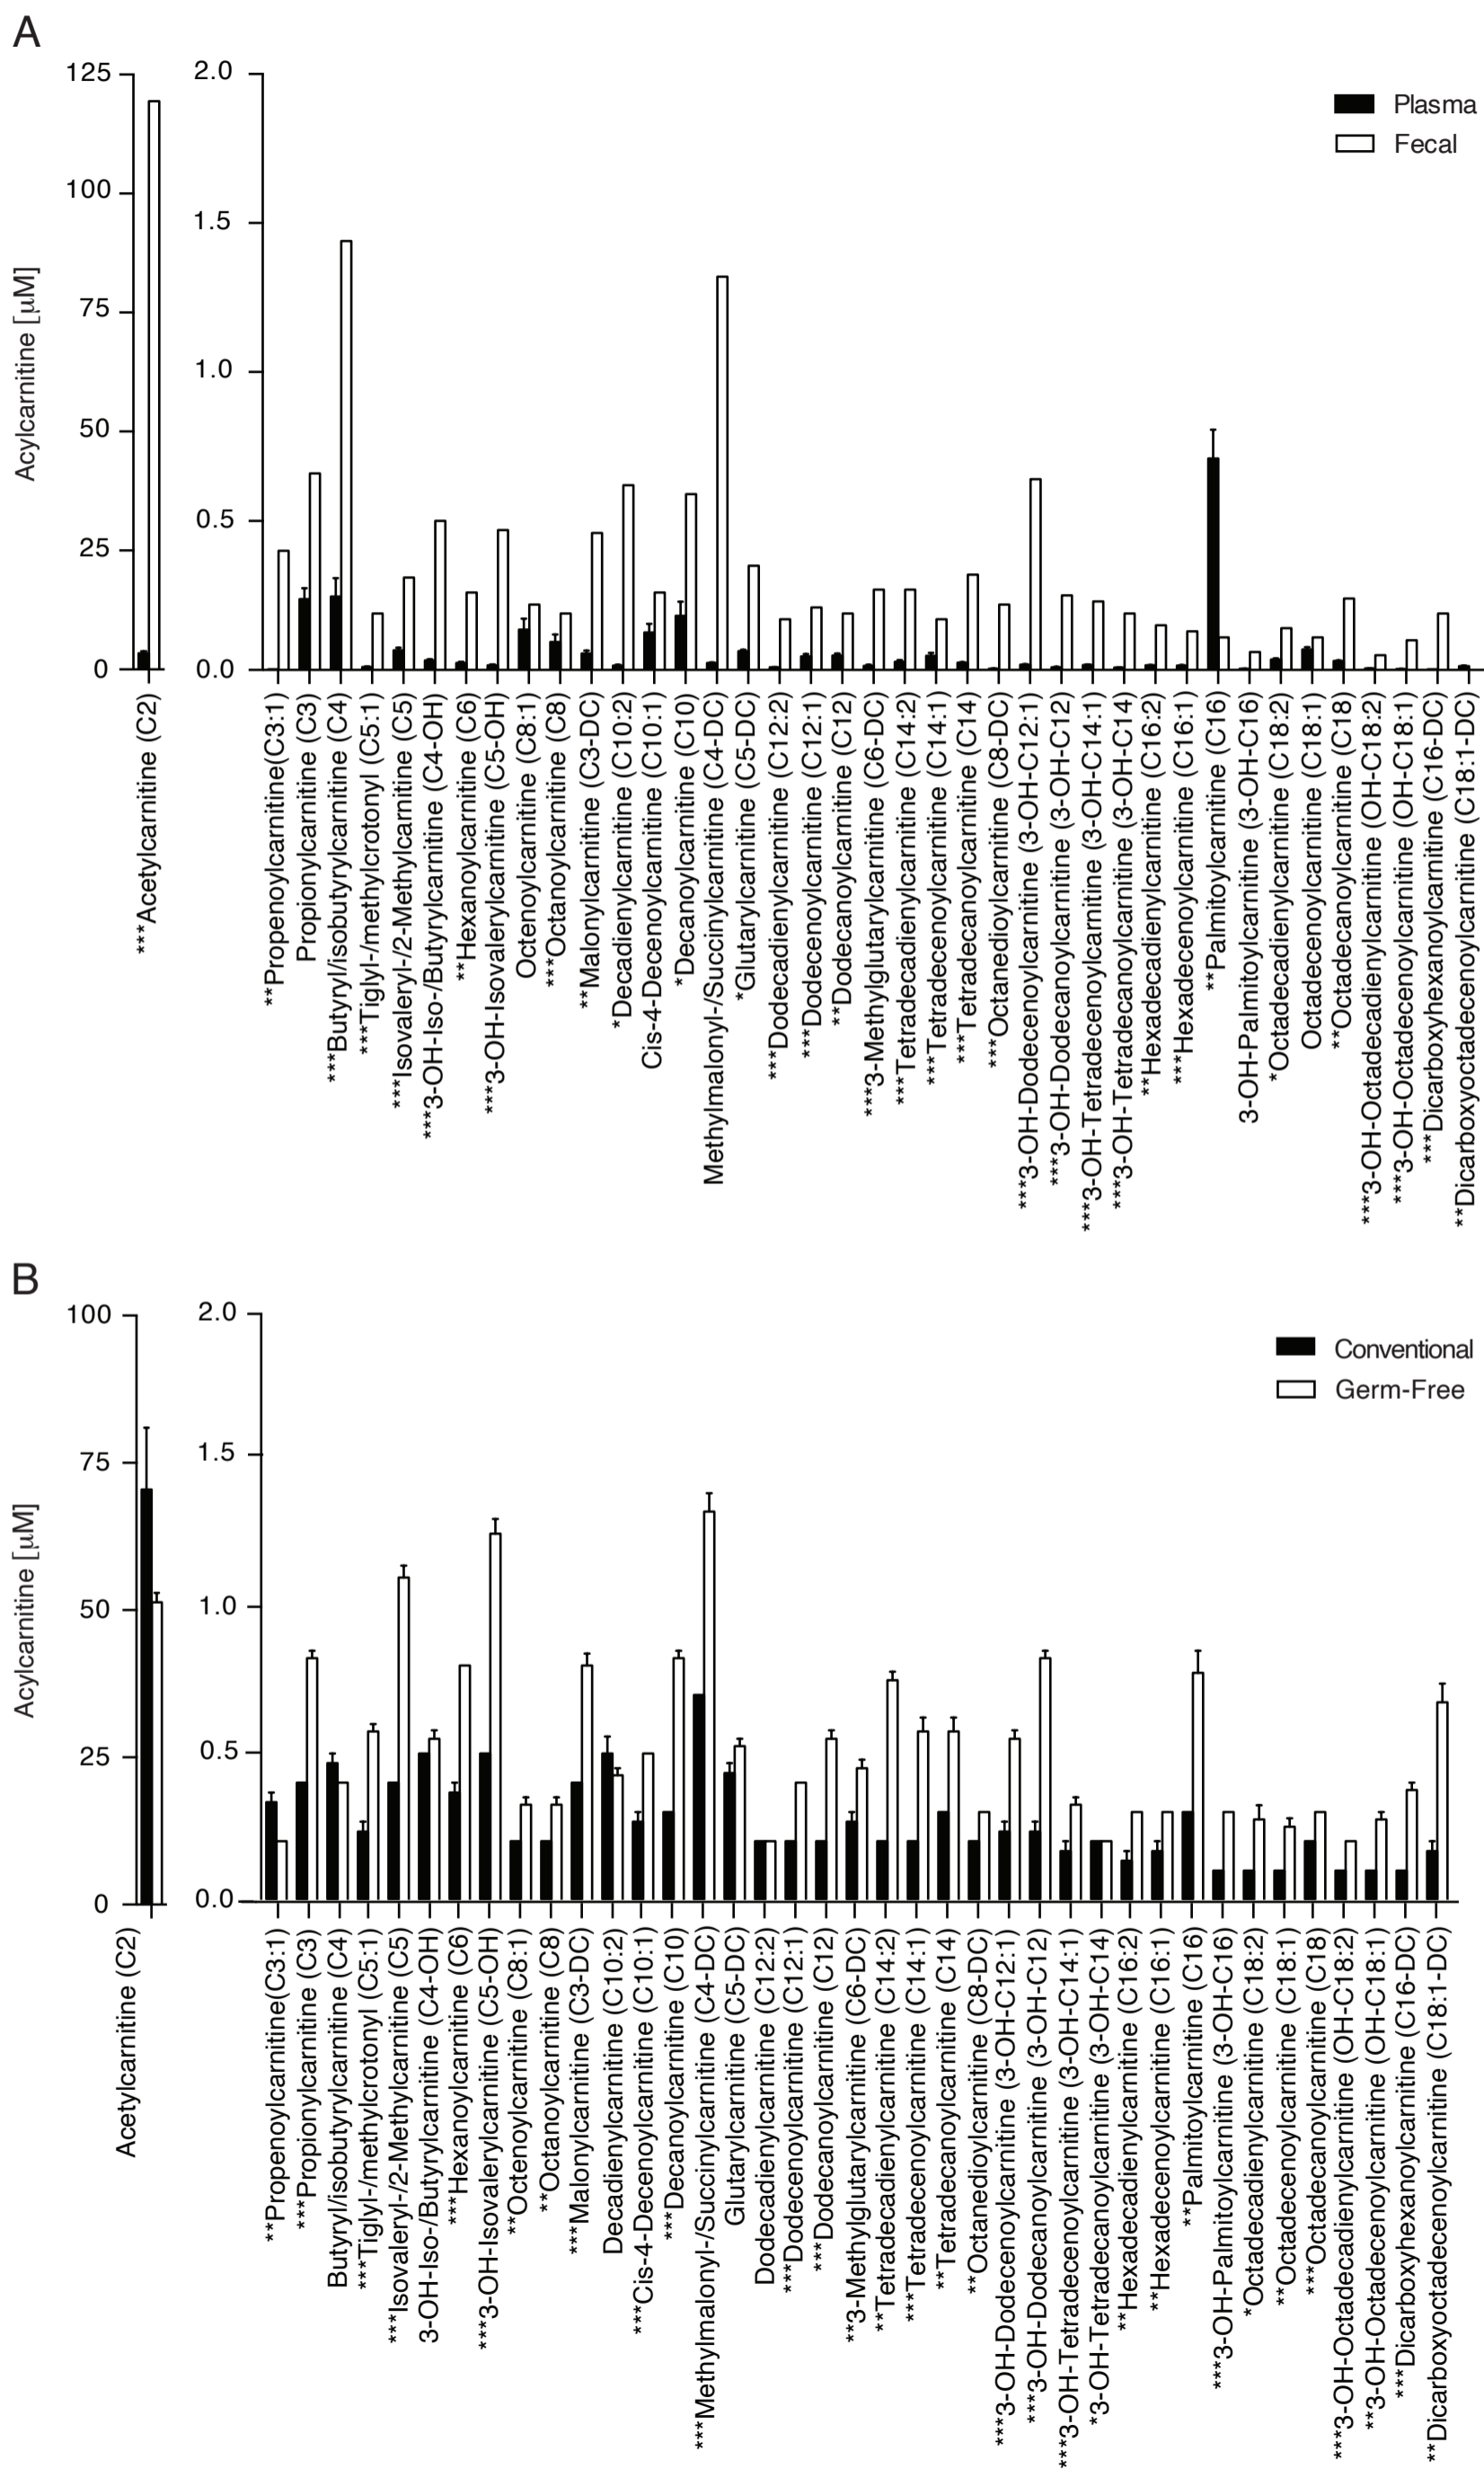

**Supplemental Figure 2.** Batch culture of the human gut microbiota grown in the presence of palmitoylcarnitine. A fecal sample from a healthy human subject was inoculated and grown for 24 hours at 37°C in three different culture media: BHI, GMM, or YCFA without and with palmitoylcarnitine. (A) Palmitoylcarnitine levels after 24 hour incubation in media alone or after inoculation with a human gut microbiota. \*\*\* $p < 0.005$  (B-D) Batch culture growth curves of healthy fecal sample grown in (B) BHI, (C) GMM or (D) YCFA culture media +/- palmitoylcarnitine. \* $p < 0.05$

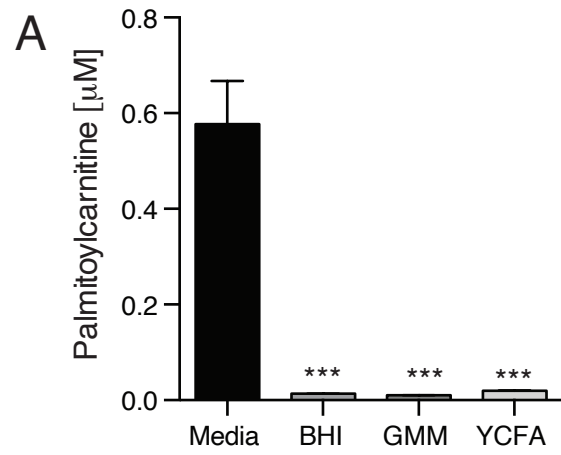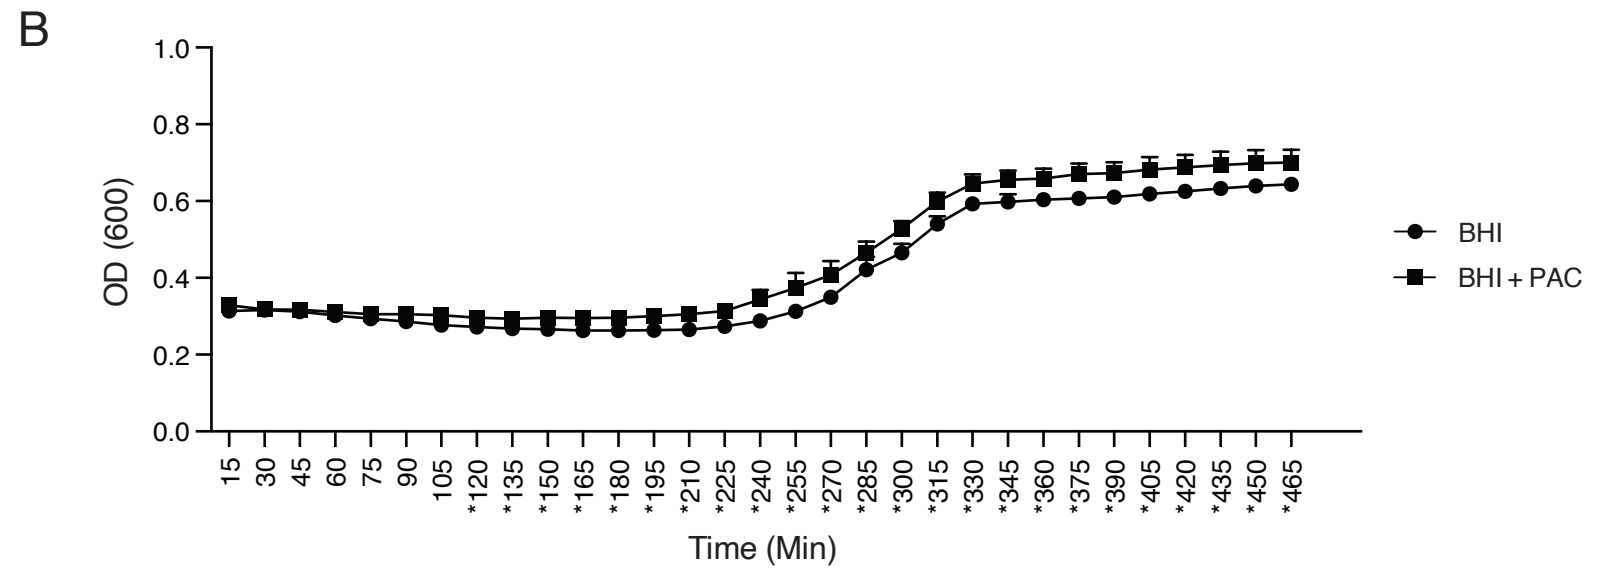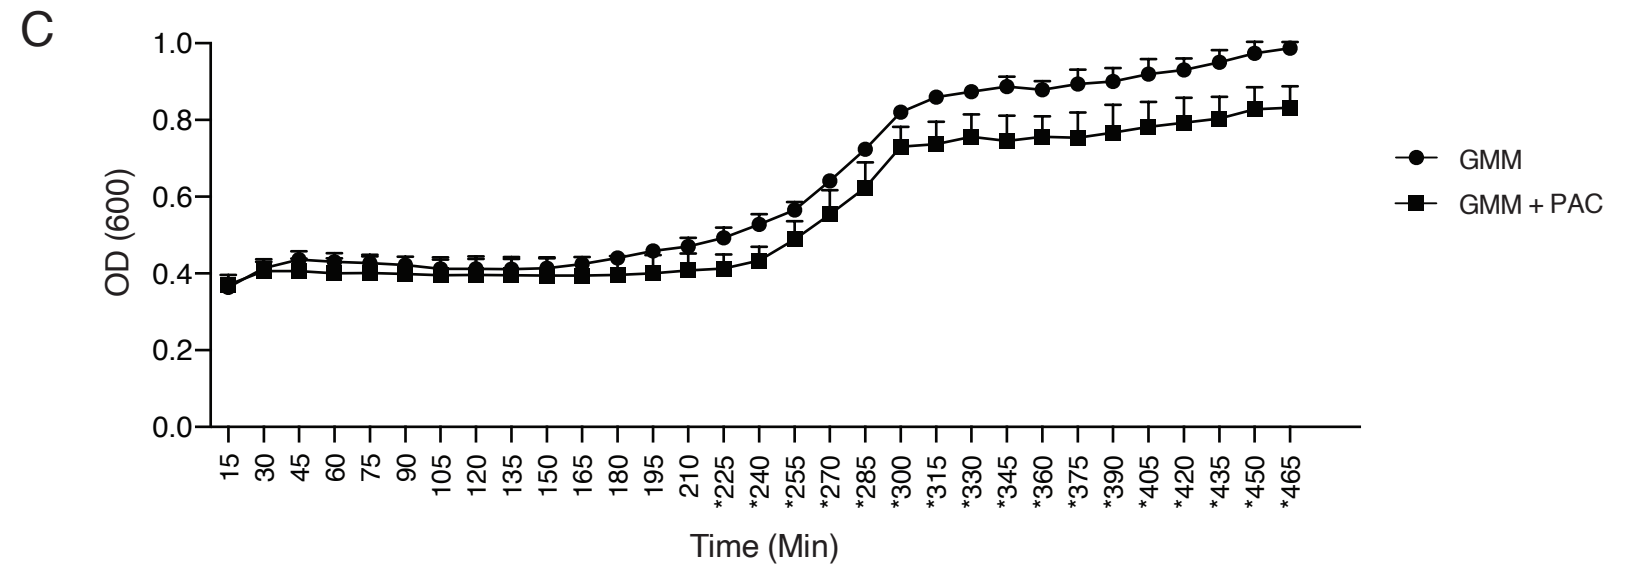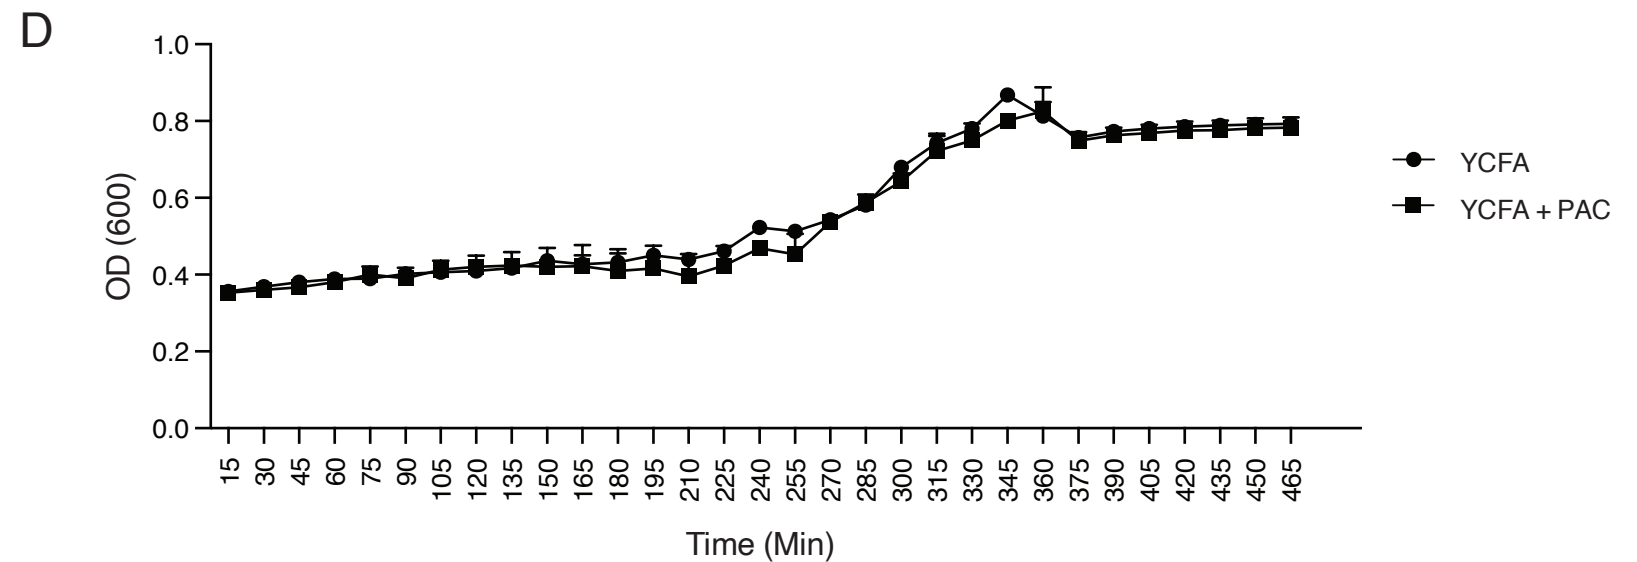

**Supplemental Figure 3.** Polarized consumption and secretion of acylcarnitines in 2-dimensional monolayers of a colonoid cell line generated from rectal biopsy from a healthy human subject. (A) Concentration of palmitoylcarnitine (PAC) in the apical and basolateral chambers of a transwell plate 24 hours after the addition of  $1\mu\text{M}$  PAC as indicated. Mean $\pm$ SEM, n=6, \*p<.05, \*\*p<.01, \*\*\*p<0.005, \*\*\*\*p<0.0001. (B) Transepithelial resistance measured after 24 and 48 hours without (CT=Control) and with PAC added to the apical chamber (Apical PAC=APAC) or the basolateral chamber (Basolateral PAC=BPAC). Mean $\pm$ SEM, n=7. \*p<0.05.

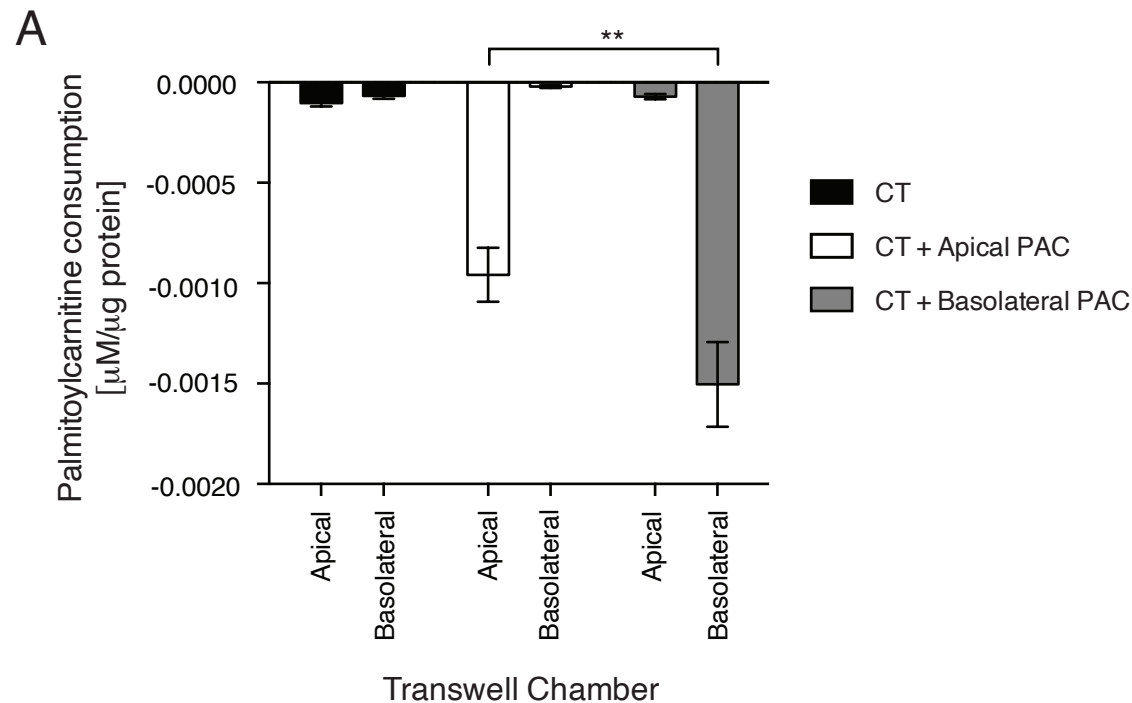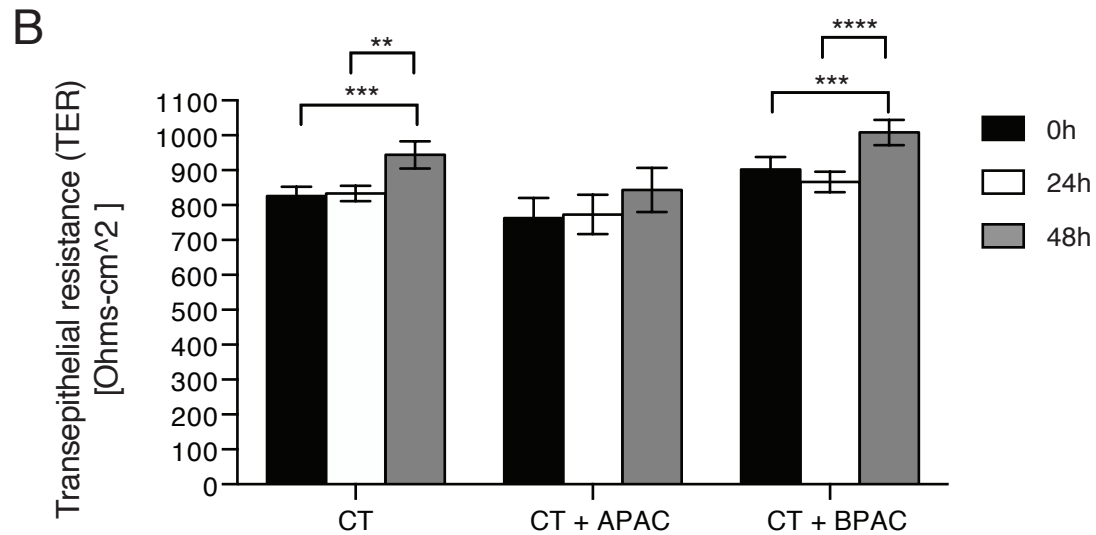

**Supplemental Figure 4.** Wild-Type mice preferentially consume short chain fatty acids while SCAD-deficient mice consume palmitoylcarnitine. Consumption of palmitoylcarnitine monitored over 4 hours in either a control buffer, sodium chloride buffer or a short chain fatty acid buffer, sodium butyrate. SCAD-deficient mice were able to consume palmitoylcarnitine in either condition. Wild-type mice. Mean $\pm$ SEM, n=4, \*p<0.05, \*\*p<0.01, \*\*\*p<0.005.

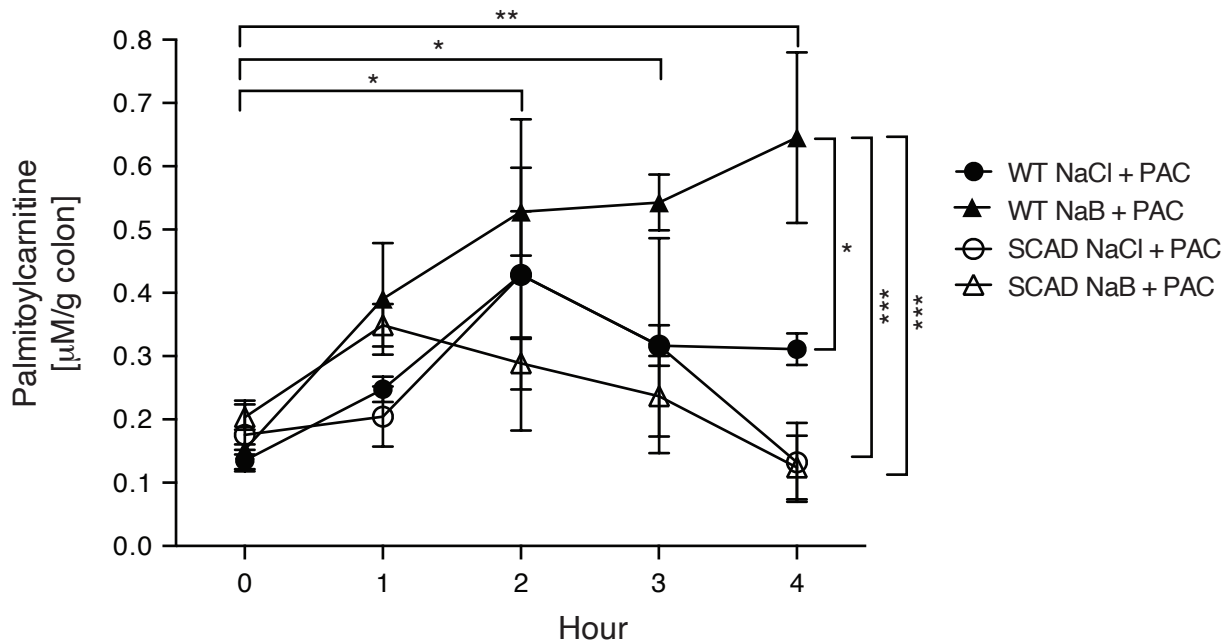

**Supplemental Figure 5.** Quantification of mitochondrial number and function in the colonic epithelium of mice infected with *C. rodentium*. (A) Mitochondrial DNA quantified by qPCR in colonic epithelial cells isolated from naïve and infected mice. n=5, Mean+SEM \*\*\*p<0.0001 (B) Mitochondrial citrate synthase activity quantified from colonic epithelial mitochondria isolated from naïve and *C. rodentium*-infected mice. n=5, Mean+SEM \*\*p<0.001. (C) MitoTracker™ Green and (D) MitoTracker™ Deep Red staining of isolated colonic epithelial cells from naïve and *C. rodentium*-infected mice (histograms for unstained cells are shown in gray). Histogram of the average fluorescence for (E) MitoTracker™ Green and (F) MitoTracker™ Deep Red staining in isolated colonic epithelial cells from naïve and infected mice, n=5, Mean + SD, \*\*\*p=0.001 and \*\*\*p=0.002 for E and F, respectively. GMFI=Geometric Mean Fluorescence Intensity. Representative results of three independent experiments.

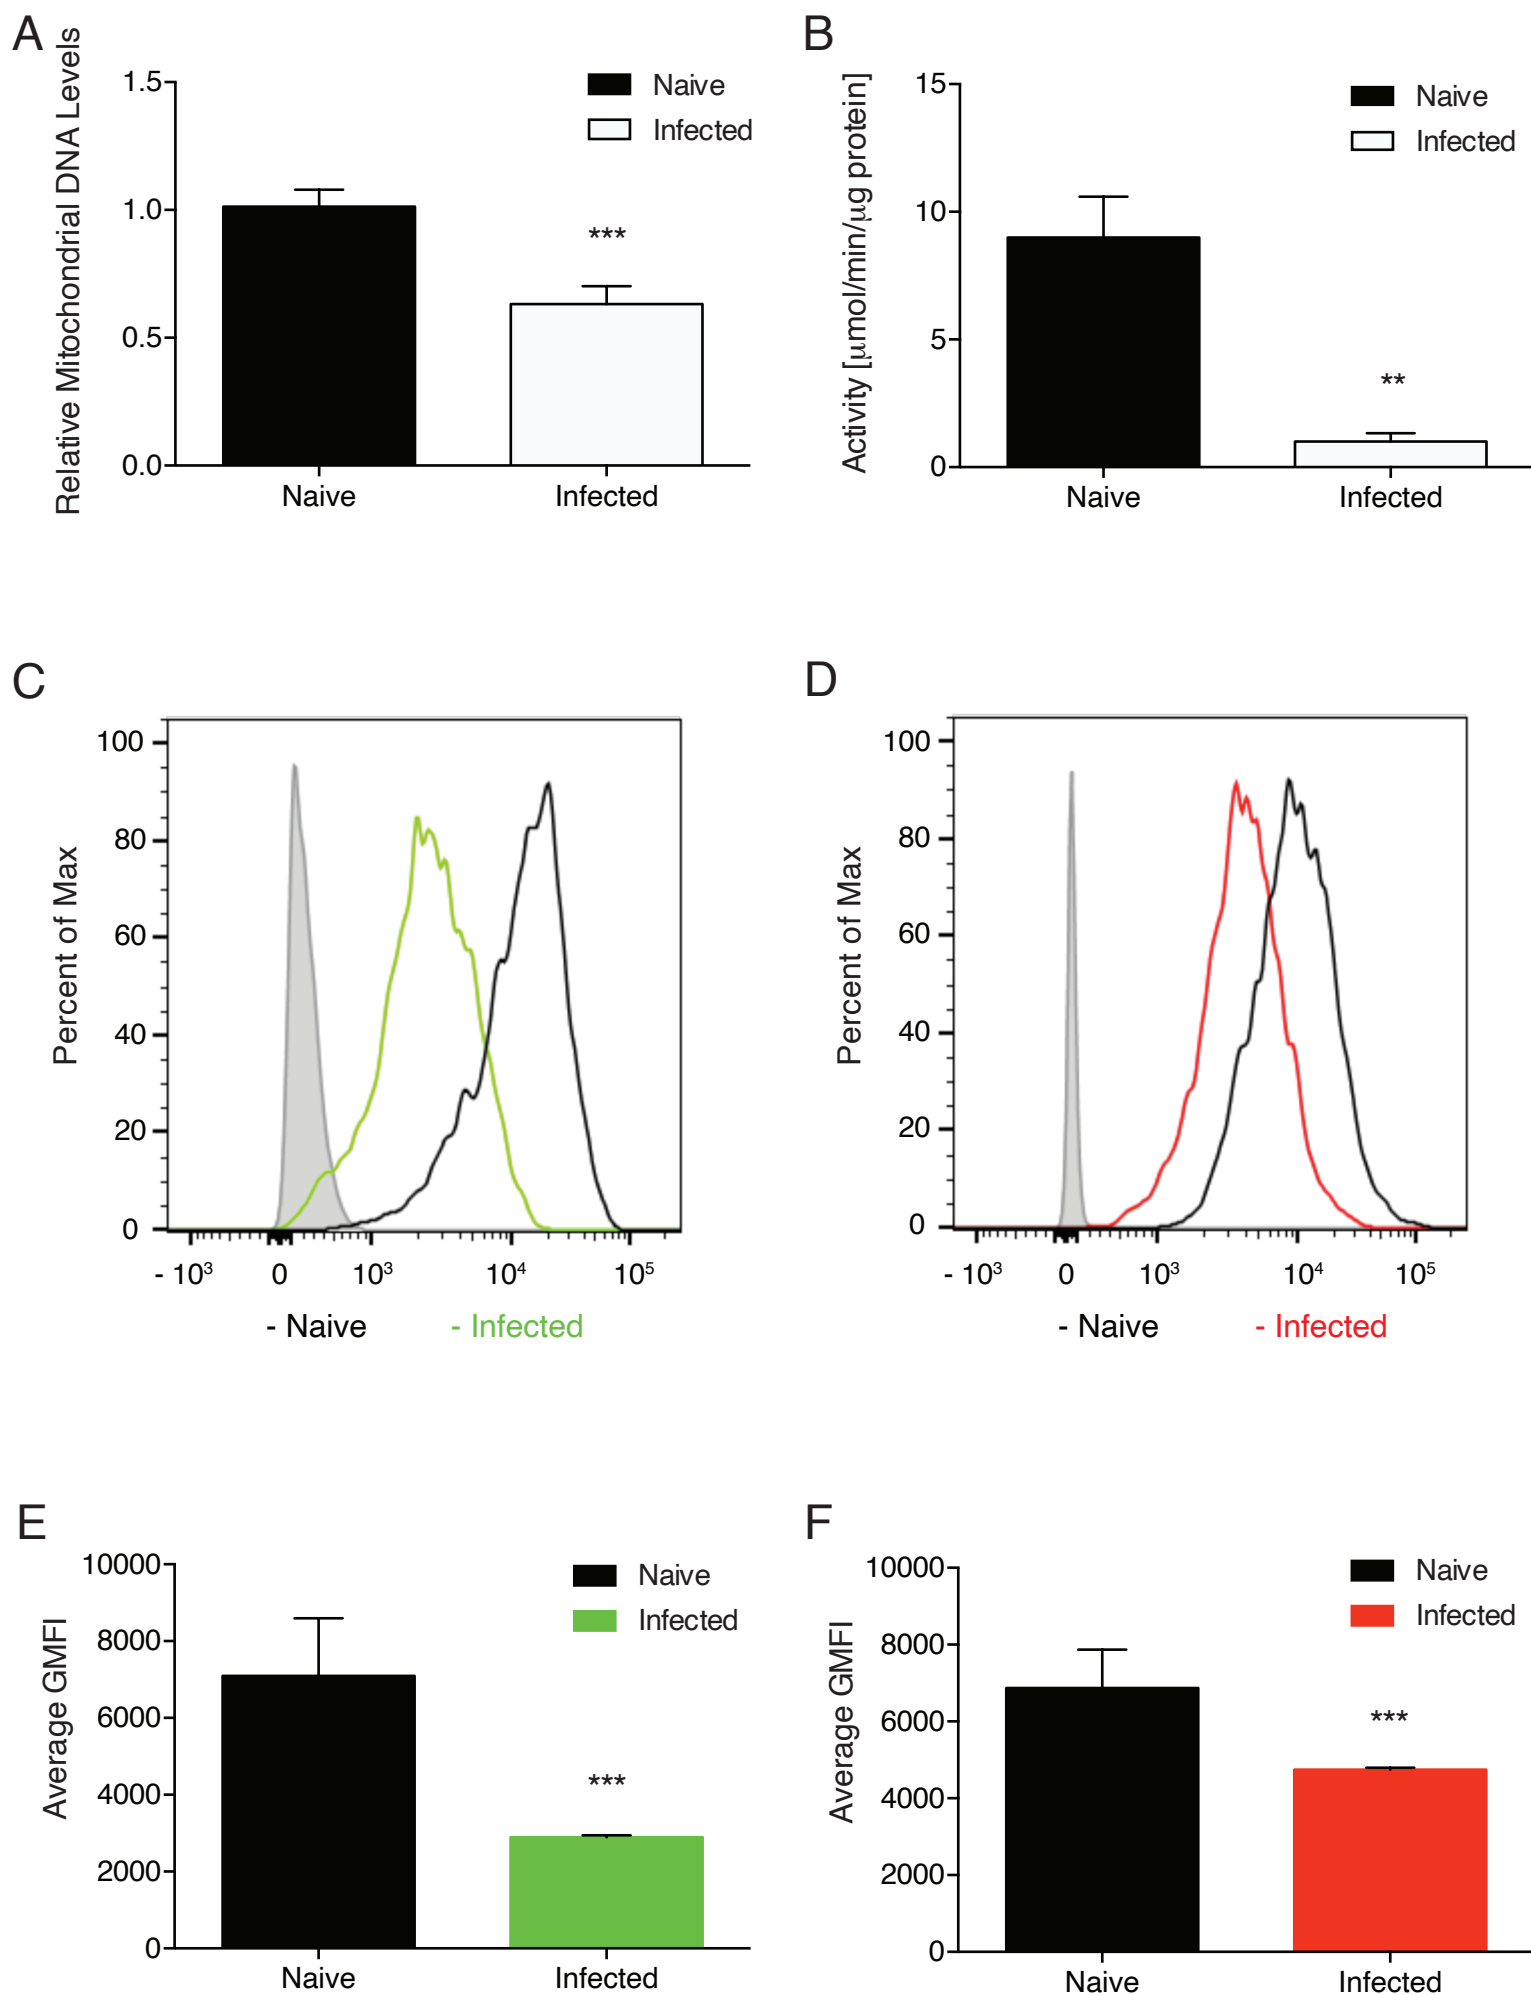

**Supplemental Figure 6.** Association between fecal metabolites with disease in pediatric patients with CD. Shown is a heat map demonstrating relative abundance of fecal metabolites before therapy according to the presence of disease, cluster assignment (“Cluster 1” is a microbiota composition similar to health where as “Cluster 2” is associated with a dysbiotic composition), FCP concentration, use of antibiotics, response or no response to therapy, and percentage of human DNA in the sample. Metadata are indicated by the color code at the top of the figure. 1° and 2° bile acids as well as most acylcarnitines are identified. Green arrows identify two acylcarnitines that have an association with disease opposite of the remaining acylcarnitines.

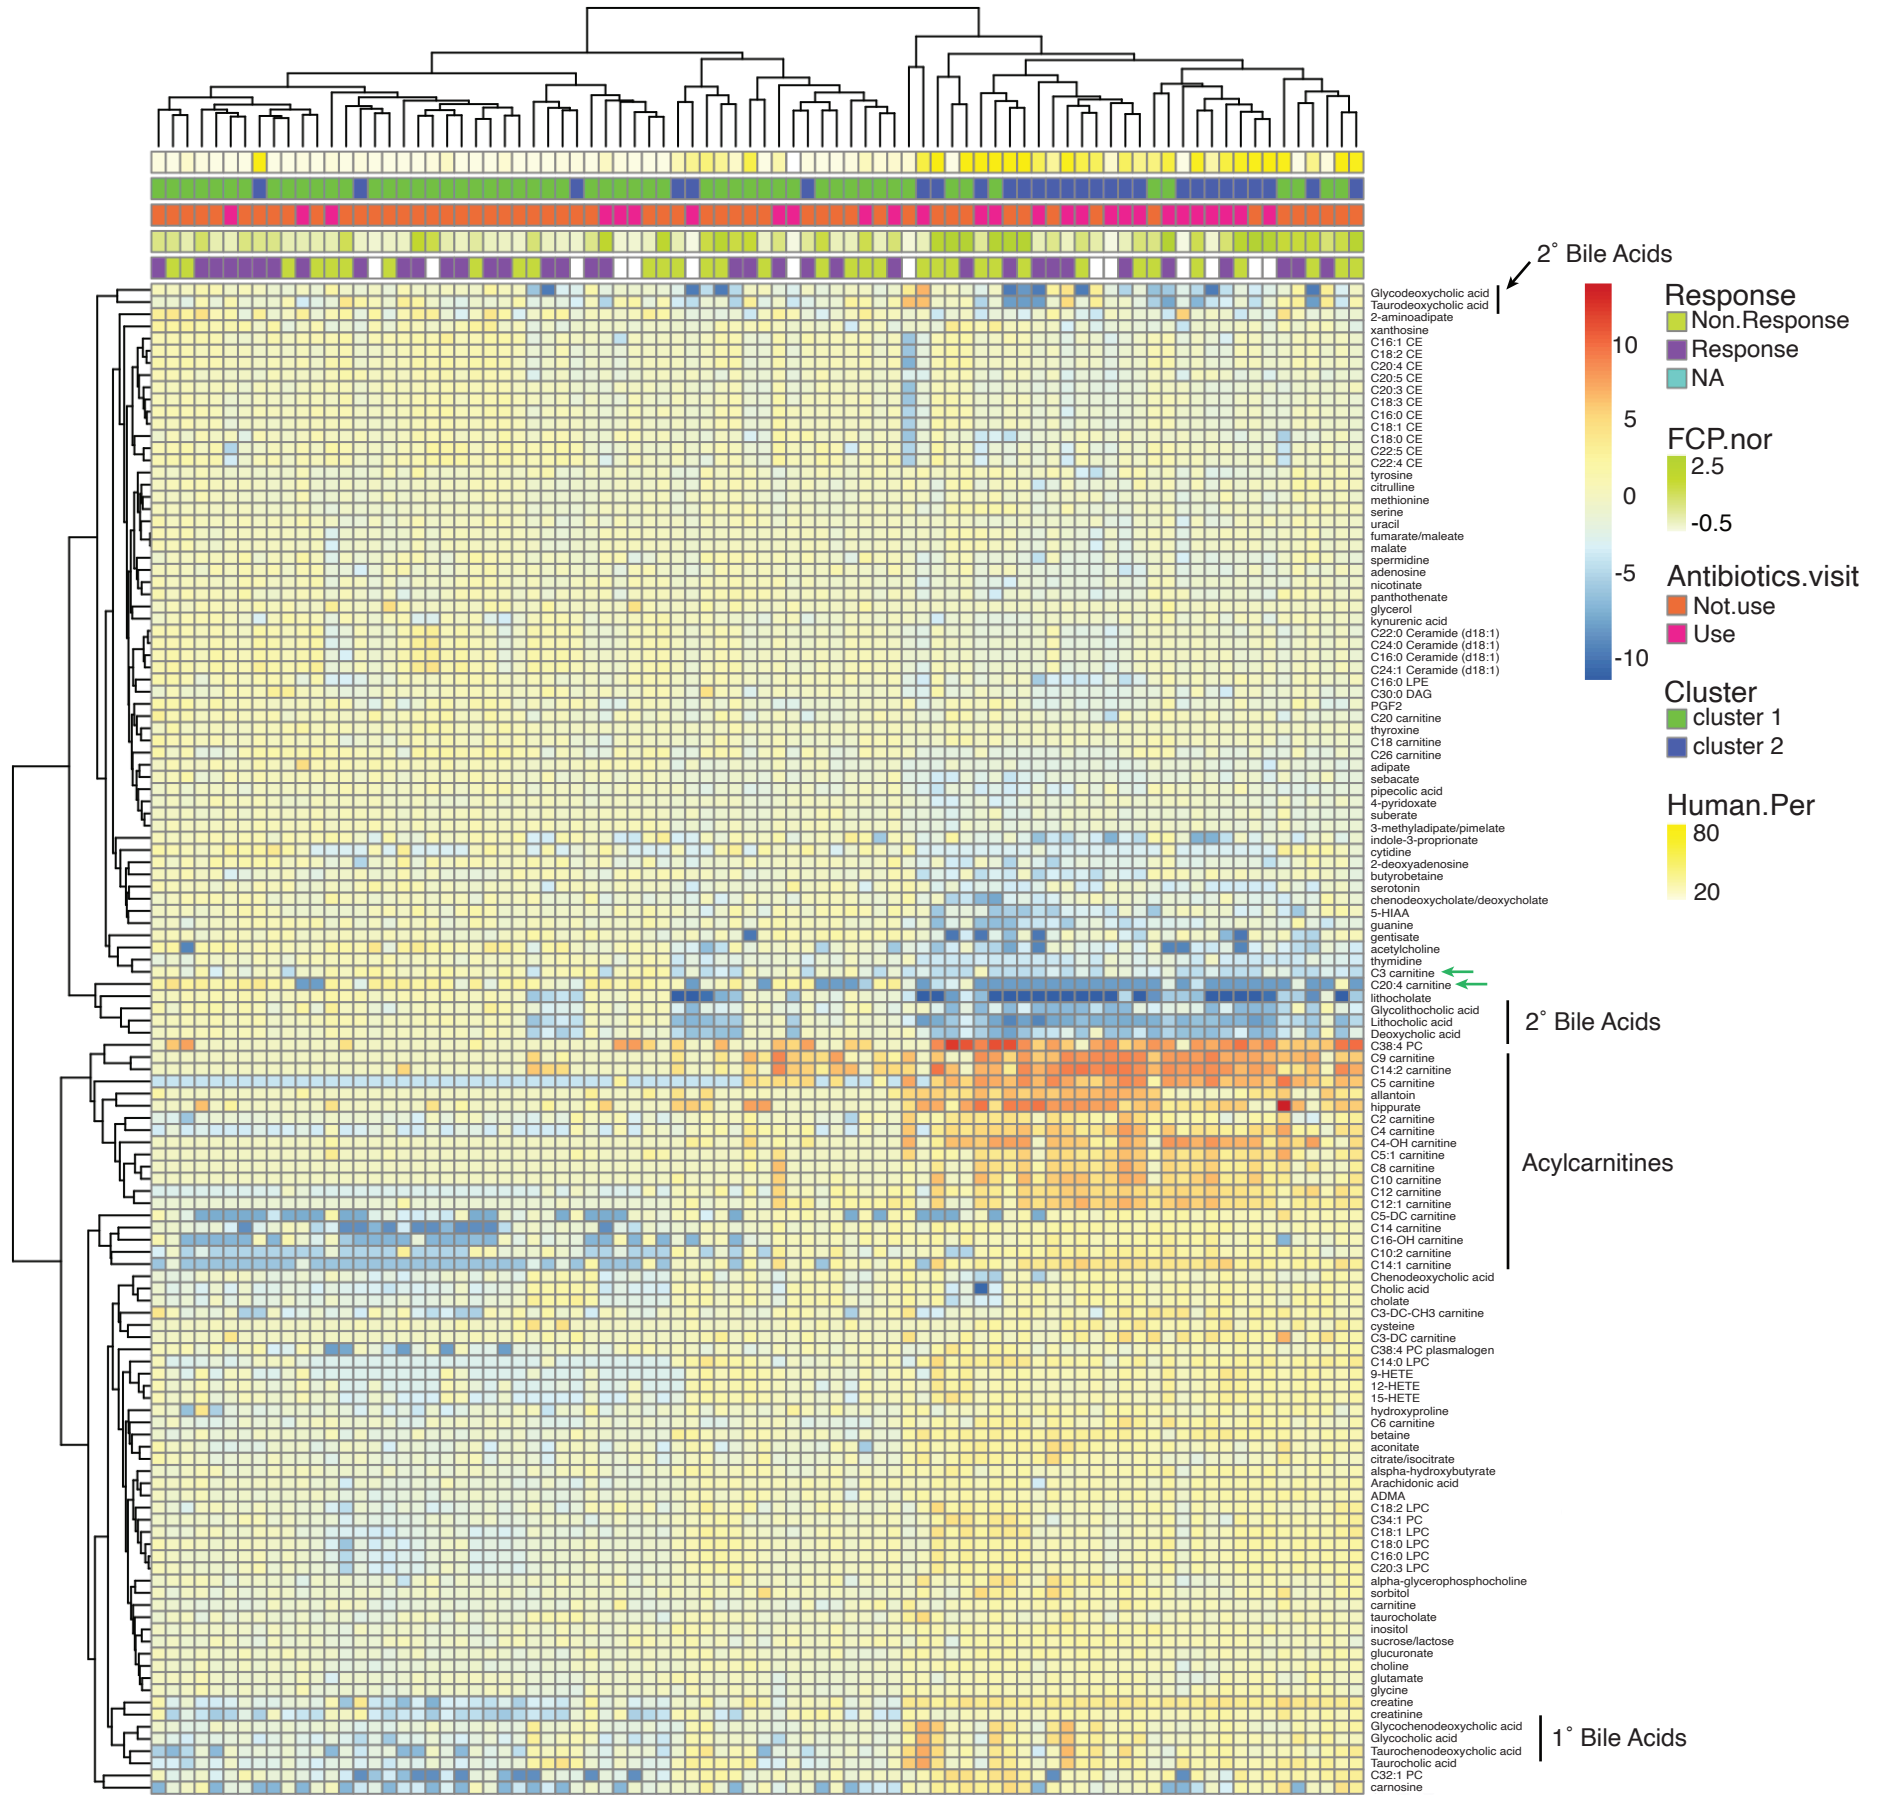

**Supplemental Figure 7.** Quantification of fecal acylcarnitines in naïve and *C. rodentium*-infected mice. Fecal acylcarnitines from naïve and infected mice were analyzed by tandem mass spectrometry. n=4, \*p<0.05, \*\*p<0.001, \*\*\*p<0.0001.

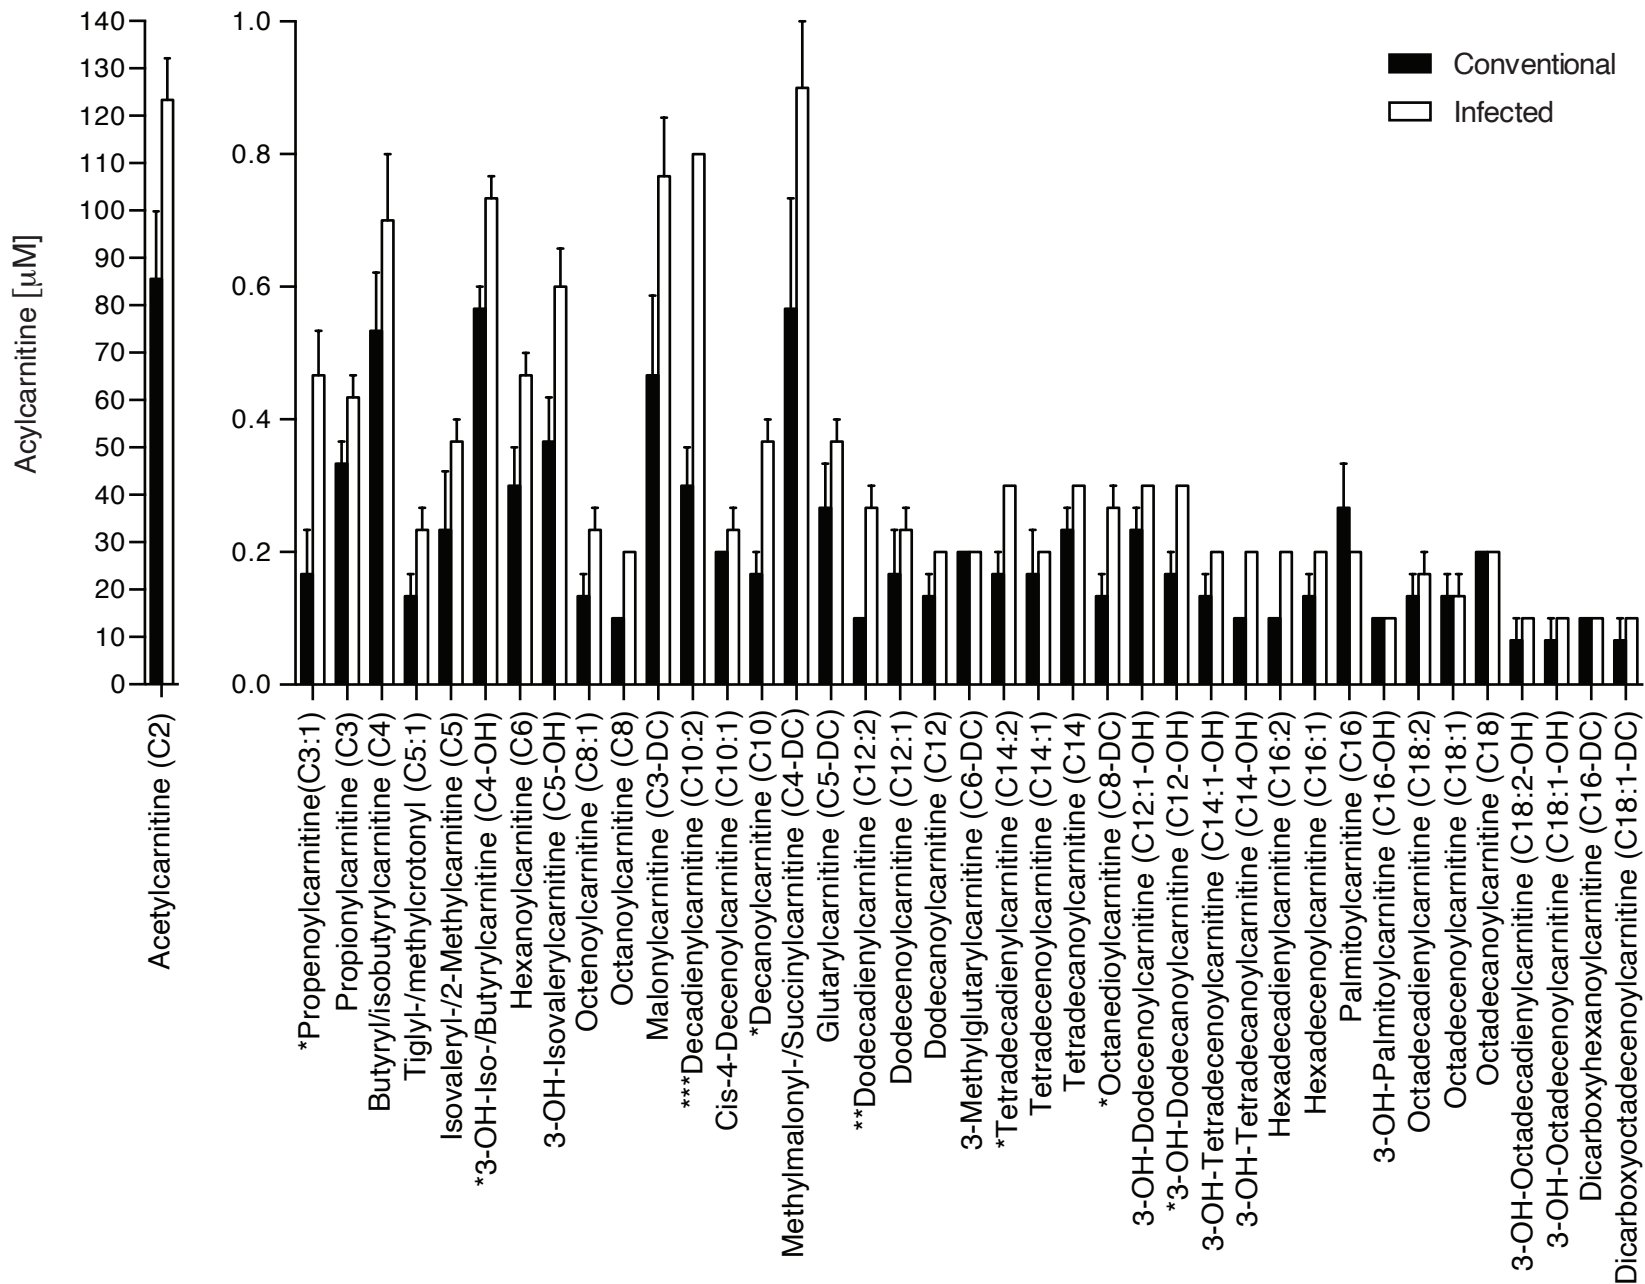

**Table S1.** Polarized consumption and secretion of acylcarnitines in 2-dimensional monolayers of a colonoid cell line generated from rectal biopsy from a healthy human subject. 2D colonoids (n=8) after 48 hours under control (CT), control + apical palmitoylcarnitine (CT+APAC), or control + basolateral palmitoylcarnitine (CT+BPAC) conditions. Acylcarnitines quantified are listed on the left column of the table (pM/ $\mu$ g) in either the apical or basolateral chamber of the transwell plate as indicated in the top row of the table. Values reported are absolute values, where red or blue indicate secretion or consumption, respectively.

Key for symbols for statistical comparisons embedded in the cells of the Table:

\*=compared to apical fraction of same treatment;  $\diamond$ =compared to respective CT fraction;  $\dagger$ =compared to respective CT+APAC fraction;  $\S$ =compared to respective CT+BPAC fraction.

1 symbol,  $p < 0.05$ ; 2 symbols,  $p < 0.01$ ; 3 symbols,  $p < 0.005$ ; 4 symbols,  $p < 0.0001$ . DC=Dicarboxylic

| 0-48h Acylcarnitine Readout [pM/ $\mu$ g] | Apical Fraction |                       |                                              | Basolateral Fraction |                            |                                                            |
|-------------------------------------------|-----------------|-----------------------|----------------------------------------------|----------------------|----------------------------|------------------------------------------------------------|
|                                           | CT              | CT+APAC               | CT+BPAC                                      | CT                   | CT+APAC                    | CT+BPAC                                                    |
| 3-OH-Iso-/Butyrylcarnitine (C4-OH)        | 36.74           | 37.62                 | 51.22<br>$\diamond\dagger$                   | 9.77<br>****         | 14.26<br>****              | 16.92<br>****                                              |
| 3-OH-Isovalerylcarnitine (C5-OH)          | 12.38           | 13.94                 | 19.01                                        | -7.81<br>****        | 1.48<br>***                | 2.70<br>**                                                 |
| 3-OH-Dodecanoylcarnitine (C12-OH)         | 2.36            | -0.05                 | 5.23                                         | -8.96<br>****        | -9.14<br>***               | -6.59<br>****                                              |
| 3-OH-Tetradecenoylcarnitine (C14:1-OH)    | 14.91           | 19.48                 | 18.89                                        | -10.43<br>***        | -4.15<br>***               | -2.55<br>***                                               |
| 3-OH-Oleoylcarnitine (C18:1-OH)           | -2.15           | -0.23                 | 4.33                                         | -5.83                | -0.53                      | 21.55                                                      |
| Octadecanoylcarnitine (C18)               | 11.66           | 12.58                 | 16.03                                        | -3.46                | 6.84                       | 3.44                                                       |
| Oleoylcarnitine (C18:1)                   | 22.05           | 22.83                 | 31.57<br>$\diamond\dagger$                   | -3.86<br>****        | -1.75<br>****              | -4.71<br>****                                              |
| Dicarboxyhexadecanoylcarnitine (C16-DC)   | 3.01            | 3.52                  | 21.10                                        | 2.22                 | 3.49                       | 90.66                                                      |
| Palmitoylcarnitine (C16)                  | -52.94<br>++++  | -1101.82              | 28.19<br>++++                                | -43.62<br>§§§§       | -6.88<br>****, §§§§        | -2760.15<br>****                                           |
| Hexadecenoylcarnitine (C16:1)             | 17.43           | 18.70                 | 25.82<br>$\diamond\dagger$                   | -1.90<br>****        | -0.41<br>****              | -0.12<br>****                                              |
| Hexadecadienylcarnitine (C16:2)           | -2.75           | -0.74                 | -0.80                                        | -3.92                | -2.25                      | -0.93                                                      |
| Tetradecanoylcarnitine (C14)              | 15.63           | 20.51                 | 24.89<br>$\diamond\diamond\diamond$          | -0.80<br>****        | 0.62<br>****               | -1.02<br>****                                              |
| Tetradecenoylcarnitine (C14:1)            | 17.28           | 18.57                 | 27.11<br>$\diamond, \dagger$                 | -4.64<br>****        | -0.76<br>****              | -1.85<br>****                                              |
| Tetradecadienylcarnitine (C14:2)          | -28.82          | -16.21                | -24.17                                       | -36.28               | -25.36                     | 3.45                                                       |
| Dodecanoylcarnitine (C12)                 | 6.24            | 6.31                  | 13.05<br>$\diamond, \dagger$                 | -8.34<br>****        | -5.56<br>****              | -8.54<br>****                                              |
| Dodecenoylcarnitine (C12:1)               | 10.74           | 13.38                 | 18.62<br>$\diamond\diamond\diamond, \dagger$ | 0.15<br>****         | 0.09<br>****               | -1.52<br>****                                              |
| Dodecadienylcarnitine (C12:2)             | 0.54            | 0.67                  | 1.49                                         | -3.97<br>**          | -2.83<br>*                 | -1.93<br>*                                                 |
| Decanoylcarnitine (C10)                   | 25.97           | 25.15                 | 38.60<br>$\diamond, \dagger$                 | 10.69<br>***         | 13.75<br>**                | 25.68<br>**, $\diamond\diamond, \dagger\dagger$            |
| Decadienylcarnitine (C10:2)               | -39.57          | -31.19                | -37.49                                       | -29.85               | -24.63                     | -27.33                                                     |
| Octanedioylcarnitine (C8-DC)              | 4.48            | 2.81                  | 3.66                                         | -0.46<br>***         | -1.09<br>*                 | 0.32<br>*                                                  |
| Octanoylcarnitine (C8)                    | 24.16           | 29.79                 | 42.68<br>$\diamond\diamond\diamond, \dagger$ | 21.73                | 22.90                      | 40.93<br>$\diamond\diamond\diamond, \dagger\dagger\dagger$ |
| Octenoylcarnitine (C8:1)                  | 13.25           | 12.36                 | 4.92                                         | 5.40                 | 2.61                       | 8.67                                                       |
| 3-Methylglutaryl carnitine (C6-DC)        | 0.56            | 0.51                  | 0.50                                         | -3.81                | -6.03<br>*                 | -2.32                                                      |
| Hexanoylcarnitine (C6)                    | 13.24           | 17.03                 | 23.34                                        | -14.85<br>****       | -7.36<br>****              | -2.95<br>****                                              |
| Glutaryl carnitine (C5-DC)                | 17.67           | 23.93                 | 31.48                                        | -4.43<br>***         | 5.01<br>***                | 10.95<br>***, $\diamond$                                   |
| Isovaleryl-/2-Methylbutyrylcarnitine (C5) | 47.08           | 61.80                 | 77.38                                        | -38.86<br>****       | -8.67<br>****              | -9.06<br>****                                              |
| Tiglyl-/Methylcrotonylcarnitine (C5:1)    | 12.18           | 12.26                 | 18.07                                        | -0.67<br>***         | 1.65<br>***                | 6.04<br>***                                                |
| Methylmalonyl-/Succinylcarnitine (C4-DC)  | 6.50            | 7.06                  | 3.85                                         | -21.14<br>****       | -25.06<br>****             | -27.03<br>****                                             |
| Butyryl/Isobutyryl (C4)                   | 410.85          | 399.79                | 582.21<br>$\diamond, \dagger$                | 109.77<br>****       | 192.40<br>***              | 238.54<br>****                                             |
| Malonylcarnitine (C3-DC)                  | 7.64            | 9.20                  | 9.31                                         | -4.39<br>*           | 3.10                       | -0.24                                                      |
| Propionylcarnitine (C3)                   | -320.15         | -226.71<br>$\diamond$ | -191.80                                      | -663.68<br>***       | -456.89<br>***             | -528.71<br>***                                             |
| Propenoylcarnitine (C3:1)                 | -38.35          | -31.66                | -50.45<br>$\diamond\diamond, \dagger\dagger$ | -48.48<br>*          | -37.16                     | -40.18<br>*                                                |
| Acetylcarnitine (C2)                      | -7848.23        | -8481.39              | -9031.78                                     | -3392.93<br>***      | 311.70<br>****, $\diamond$ | 295.35<br>****, $\diamond$                                 |



**Table S2.** Evaluation of MTCO1 staining patterns in human colonic surgical specimens. Number of subjects (1 to 4 surgical specimens per subject): 11 Controls, 16 Chron’s Disease (CD), 10 Ulcerative Colitis (UC).

Three parameters for “localization and intensity of staining” are reported for each surgical specimen:

- 1) Epithelial location described as: Deep gland, superficial gland, surface epithelium
- 2) Intensity of staining scored: Minimal, 1+, 2+, 3+
- 3) Pattern of epithelial cellular staining described as: Diffuse cytoplasmic, peri-nuclear, supra-nuclear, sub-nuclear (must span the distance of 5 colonic crypts).

| Disease/Patient | High Powered Field | Age | Sex | Histologic Architecture                                                                                                                                             | Localization, Intensity and Pattern of Staining                                                                                        |
|-----------------|--------------------|-----|-----|---------------------------------------------------------------------------------------------------------------------------------------------------------------------|----------------------------------------------------------------------------------------------------------------------------------------|
| Control 1       | A                  | 55  | M   | Colonic mucosal surgical specimen without definite pathologic abnormalities                                                                                         | Deep glands 1+ perinuclear<br>Superficial epithelium minimal staining perinuclear                                                      |
| Control 1       | B                  | 55  | M   | Colonic mucosal surgical specimen without definite pathologic abnormalities                                                                                         | Deep glands 1+ minimal perinuclear<br>Superficial epithelium 2+ staining supranuclear and perinuclear                                  |
| Control 1       | C                  | 55  | M   | Colonic mucosal surgical specimen without definite pathologic abnormalities                                                                                         | Deep glands 1+ Mild to moderate cytoplasm<br>Superficial glands 2+ perinuclear and supranuclear                                        |
| Control 1       | D                  | 55  | M   | Colonic mucosal surgical specimen without definite pathologic abnormalities                                                                                         | Deep glands 2+ perinuclear<br>Superficial glands 2+ to 3+ perinuclear and supranuclear                                                 |
| Control 2       | A                  | 73  | F   | Hyperplastic polyp                                                                                                                                                  | Deep glands minimal cytoplasmic staining<br>Hyperplastic polyp minimal to absent staining                                              |
| Control 2       | B                  | 73  | F   | Colonic mucosal surgical specimen without definite pathologic abnormalities                                                                                         | Deep glands 1+ cytoplasmic<br>Superficial glands 2+ supranuclear                                                                       |
| Control 2       | C                  | 73  | F   | Colonic mucosal surgical specimen with irregular architecture                                                                                                       | Deep glands negative staining<br>Superficial epithelium 2+ to 3+ supranuclear staining                                                 |
| Control 2       | D                  | 73  | F   | Tubular adenoma                                                                                                                                                     | Deep glands no staining<br>Superficial epithelium no significant staining                                                              |
| Control 3       | A                  | 67  | M   | Polypoid fragment of benign colonic mucosa showing mucosal erosion with acute inflammation and hyperplastic changes compatible with inflammatory/hyperplastic polyp | Deep glands 1+ cytoplasmic staining<br>Superficial epithelium absent                                                                   |
| Control 4       | A                  | 60  | M   | Fragments of benign colonic mucosa showing focal acute inflammation<br>No evidence of architectural disarray, granuloma formation or dysplasia                      | Deep glands patchy 1+ to 2+ cytoplasmic staining<br>Superficial epithelium 2+ cytoplasmic staining with significant submucous staining |
| Control 4       | B                  | 60  | M   | Fragments of benign colonic mucosa showing focal mild acute inflammation                                                                                            | Deep glands with no significant staining<br>Superficial epithelium 3+ cytoplasmic staining with prominent subnuclear distribution      |

|           |   |    |   |                                                                                                                                                                                                  |                                                                                                                          |
|-----------|---|----|---|--------------------------------------------------------------------------------------------------------------------------------------------------------------------------------------------------|--------------------------------------------------------------------------------------------------------------------------|
| Control 4 | C | 60 | M | Fragments of benign colonic mucosa showing focal mild acute inflammation                                                                                                                         | Deep glands with no significant staining<br>Superficial epithelium 2+ cytoplasmic staining                               |
| Control 5 | A | 57 | M | Tubular adenoma                                                                                                                                                                                  | Deep glands 1+ to 2+ cytoplasmic staining<br>Superficial epithelium 2+ to 3+ cytoplasmic staining                        |
| Control 5 | B | 57 | M | Colonic mucosal surgical specimen with focal lymphangiectasia seen                                                                                                                               | Deep glands 2+ cytoplasmic staining<br>Superficial epithelium 1+ superficial staining                                    |
| Control 5 | C | 57 | M | Fragments of tubular adenoma<br>The margins of the specimen cannot be assessed due to the fragmented nature of the specimen                                                                      | Deep glands 1+ patchy cytoplasmic staining<br>Superficial epithelium patchy 1+ cytoplasmic staining                      |
| Control 6 | A | 77 | F | Fragments of tubular adenoma<br>The margins of the specimen cannot be assessed due to the fragmented nature of the specimen                                                                      | Deep glands without significant staining<br>Superficial epithelium with 1+ cytoplasmic staining                          |
| Control 6 | B | 77 | F | Colonic mucosa with focal acute inflammation and scarring of the lamina propria and detached fibrinopurulent exudate<br>Ulcer or focus of ischemia cannot be excluded                            | Deep glands without significant staining<br>Superficial epithelium with 2+ patchy supranuclear staining                  |
| Control 7 | A | 71 | F | A fragment of benign colonic mucosa containing intramucosal lymphoid nodule showing focal minimal acute inflammation and minimal hyperplastic changes                                            | Deep glands mild 1+ cytoplasmic staining<br>Superficial epithelium 3+ cytoplasmic staining<br>predominantly supranuclear |
| Control 7 | B | 71 | F | Polypoid shaped cauterized fragment of benign colonic mucosa showing mucosal erosion with mild acute inflammation and focal hyperplastic changes compatible with inflammatory/hyperplastic polyp | Deep glands no definite specific staining<br>Surface epithelium 2+ cytoplasmic staining                                  |
| Control 8 | A | 58 | F | Tubular adenoma                                                                                                                                                                                  | Deep glands without significant staining<br>Superficial glands with nonspecific staining                                 |
| Control 8 | B | 58 | F | Fragments of benign colonic mucosa showing mucosal erosion with glandular atrophy, lamina propria fibrosis and mild acute inflammation, cannot rule ischemic colitis                             | Deep glands with 1+ cytoplasmic staining<br>Superficial epithelium with 2+ supranuclear staining                         |

|            |   |    |   |                                                                                                                                                                                                                             |                                                                                                                          |
|------------|---|----|---|-----------------------------------------------------------------------------------------------------------------------------------------------------------------------------------------------------------------------------|--------------------------------------------------------------------------------------------------------------------------|
|            |   |    |   | Clinical correlation is recommended                                                                                                                                                                                         |                                                                                                                          |
| Control 9  | A | 70 | F | One of two polypoid fragments of benign colonic mucosa showing acute inflammation and mild hyperplastic changes<br>No evidence of adenomatous changes                                                                       | Deep glands without significant staining<br>Superficial glands with diffuse 1+ cytoplasmic staining                      |
| Control 10 | A | 68 | M | One of two fragments of colonic mucosa showing focus suggestive of early adenomatous changes                                                                                                                                | Deep glands without significant staining<br>Superficial glands with 1+ diffuse cytoplasmic staining                      |
| Control 11 | A | 68 | M | A fragment of benign colonic mucosa showing mild acute inflammation<br>No evidence of architectural disarray, granuloma formation, dysplasia or adenomatous                                                                 | Deep glands with one plus cytoplasmic staining<br>Superficial glands with patchy 1+ cytoplasmic staining                 |
| CD 1       | A | 42 | F | Colonic mucosal surgical specimen without definite pathologic abnormalities                                                                                                                                                 | Deep glands minimal cytoplasmic staining<br>Superficial glands 2+ perinuclear and supranuclear staining                  |
| CD 1       | B | 42 | F | Colonic mucosal surgical specimen with acute inflammation and architecture disarray with reactive changes                                                                                                                   | Deep glands no staining<br>Superficial epithelium 2+ to 3+ supranuclear staining and cytoplasmic staining                |
| CD 2       | A | 57 | M | Fragments of benign colonic mucosa showing acute inflammation and architectural disarray<br>Expansion of lamina propria by acute and chronic inflammatory cells noted<br>No evidence of granuloma formation or dysplasia    | Deep glands no significant staining<br>Superficial epithelium 2+ cytoplasmic staining                                    |
| CD 2       | B | 57 | M | Fragments of benign colonic mucosa showing acute inflammation and architectural disarray<br>Expansion of lamina propria by acute and chronic inflammatory cells noted<br>No evidence of granuloma formation or dysplasia    | Deep glands no significant staining<br>Superficial glands patchy 2+ cytoplasmic staining, focally significant subnuclear |
| CD 2       | C | 57 | M | Fragments of benign colonic mucosa showing architectural disarray and mild expansion of lamina propria by acute and chronic inflammatory cells noted<br>No evidence of acute inflammation, granuloma formation or dysplasia | Superficial glands patchy 2+ subnuclear staining                                                                         |
| CD 2       | D | 57 | M | Fragments of benign colonic mucosa showing architectural disarray                                                                                                                                                           | Deep glands no significant staining                                                                                      |

|      |   |    |   |                                                                                                                                                                                                                                                                                    |                                                                                                                                |
|------|---|----|---|------------------------------------------------------------------------------------------------------------------------------------------------------------------------------------------------------------------------------------------------------------------------------------|--------------------------------------------------------------------------------------------------------------------------------|
|      |   |    |   | No evidence of acute inflammation, granuloma formation or dysplasia                                                                                                                                                                                                                | Superficial glands patchy 2+ subnuclear staining                                                                               |
| CD 3 | A | 22 | M | Fragments of benign colonic mucosa containing intramucosal lymphoid nodules showing no significant histopathologic changes                                                                                                                                                         | Deep glands no significant staining<br>Superficial epithelium with 3+ cytoplasmic staining with focal subnuclear concentration |
| CD 3 | B | 22 | M | Fragments of benign colonic mucosa containing intramucosal lymphoid nodules showing no significant histopathologic changes                                                                                                                                                         | Deep glands without significant staining<br>Superficial epithelium patchy 2+ predominantly subnuclear staining                 |
| CD 3 | C | 22 | M | Fragments of benign colonic mucosa containing intramucosal lymphoid nodules showing no significant histopathologic changes                                                                                                                                                         | Deep glands without significant staining<br>Superficial epithelium 1+ to 2+ subnuclear staining                                |
| CD 4 | A | 55 | M | Colonic mucosal surgical specimen with acute inflammation and architectural disarray<br>Fibrinopurulent exudate                                                                                                                                                                    | Deep glands with minimal cytoplasmic staining<br>Superficial glands with minimal cytoplasmic staining                          |
| CD 4 | B | 55 | M | Colonic mucosal surgical specimen with mild architectural disarray, mild acute inflammation                                                                                                                                                                                        | Deep glands without significant staining<br>Superficial epithelium with 2+ cytoplasmic staining                                |
| CD 4 | C | 55 | M | Colonic mucosal surgical specimen with acute inflammation and architectural disarray                                                                                                                                                                                               | Deep glands without significant staining<br>Superficial epithelium with minimal cytoplasmic staining                           |
| CD 5 | A | 49 | M | Colonic mucosal surgical specimen with focal acute inflammation, as well as expansion of lamina propria by predominantly chronic inflammatory cells and eosinophils with few rare acute inflammatory cells<br>Focal crypt architectural disarray<br>No dysplasia or granuloma seen | Superficial glands with patchy cytoplasmic and focally subnuclear staining 1+                                                  |
| CD 5 | B | 49 | M | Colonic mucosal surgical specimen with acute colitis and crypt architectural disarray<br>No dysplasia or granuloma seen                                                                                                                                                            | Deep glands and mild 1+ cytoplasmic staining<br>Superficial glands with patchy predominantly subnuclear 2+ staining            |
| CD 5 | C | 49 | M | Colonic mucosal surgical specimen with acute colitis and crypt architectural disarray<br>No dysplasia or granuloma seen                                                                                                                                                            | Deep glands no definite staining<br>With patchy 1+ predominantly subnuclear staining                                           |
| CD 6 | A | 27 | F | Colonic mucosal surgical specimen with predominantly mild                                                                                                                                                                                                                          | Deep glands without significant staining                                                                                       |

|      |   |    |   |                                                                                                                                                                                                                                                                                                         |                                                                                                          |
|------|---|----|---|---------------------------------------------------------------------------------------------------------------------------------------------------------------------------------------------------------------------------------------------------------------------------------------------------------|----------------------------------------------------------------------------------------------------------|
|      |   |    |   | expansion of the lamina propria by chronic inflammatory cells<br>Few rare acute inflammatory cells noted<br>Focal crypt architectural disarray is present<br>Granuloma present<br>Negative for dysplasia                                                                                                | Superficial epithelium with 1+ cytoplasmic staining patchy                                               |
| CD 6 | B | 27 | F | Colonic mucosal surgical specimen with focal acute inflammation and expansion of the lamina propria by predominantly chronic inflammatory cells<br>Focal crypt architectural disarray is present<br>Granulomas present<br>Negative for dysplasia                                                        | Deep glands without significant staining<br>Superficial epithelium 2+ cytoplasmic staining               |
| CD 6 | C | 27 | F | Colonic mucosal surgical specimen with focal acute inflammation, expansion of lamina propria by chronic inflammatory cells<br>No definite crypt architectural disarray<br>No dysplasia or granuloma seen                                                                                                | Deep glands without significant staining<br>Superficial glands with minimal cytoplasmic staining         |
| CD 7 | A | 41 | F | Colonic mucosal surgical specimen with minimal expansion of the lamina propria by predominantly chronic inflammatory cells.<br>Focal rare crypt architectural disarray is noted.<br>No dysplasia or granuloma seen                                                                                      | Deep glands without significant staining<br>Superficial glands with 1+ subnuclear staining               |
| CD 7 | B | 41 | F | Colonic mucosal surgical specimen with minimal expansion of the lamina propria by predominantly chronic inflammatory cells and few eosinophils with some eosinophils focally dotting the superficial epithelium<br>Rare focal crypt architectural disarray is present<br>No dysplasia or granuloma seen | Deep glands minimal cytoplasmic staining<br>Superficial glands with 2+ diffuse cytoplasmic staining      |
| CD 7 | C | 41 | F | Colonic mucosal surgical specimen with mild expansion of the lamina propria by chronic inflammatory cells and few eosinophils with a few rare eosinophils also seen in the                                                                                                                              | Deep glands with minimal cytoplasmic staining<br>Superficial glands with 1+ diffuse cytoplasmic staining |

|       |   |    |   |                                                                                                                                                                                                                                                      |                                                                                                               |
|-------|---|----|---|------------------------------------------------------------------------------------------------------------------------------------------------------------------------------------------------------------------------------------------------------|---------------------------------------------------------------------------------------------------------------|
|       |   |    |   | superficial epithelium focally<br>Reactive atypia is noted<br>Focal crypt architectural disarray is present<br>No dysplasia or granuloma seen                                                                                                        |                                                                                                               |
| CD 8  | A | 59 | M | Intestinal mucosal surgical specimen with acute inflammation focally present<br>No dysplasia or granuloma seen                                                                                                                                       | Deep glands 2+ cytoplasmic staining<br>Superficial glands with diffuse 1+ to 2+ cytoplasmic staining          |
| CD 8  | B | 59 | M | Colonic mucosal surgical specimen with no significant histopathologic changes<br>No dysplasia or granuloma seen                                                                                                                                      | Deep glands minimal cytoplasmic staining<br>Superficial glands with patchy 3+ cytoplasmic staining            |
| CD 8  | C | 59 | M | Colonic mucosal surgical specimen with minimal expansion of the lamina propria by chronic inflammatory cells<br>No dysplasia or granuloma seen                                                                                                       | Deep glands without significant staining<br>Superficial glands with 3+ cytoplasmic staining                   |
| CD 9  | A | 22 | F | Colonic mucosal surgical specimen with no significant histopathologic changes<br>No dysplasia or granuloma seen                                                                                                                                      | Deep glands without significant staining<br>Superficial glands with 1+ cytoplasmic staining                   |
| CD 9  | B | 22 | F | Colonic mucosal surgical specimen with prominent acute inflammation and crypt architectural disarray<br>Focal reactive atypia is noted in areas of acute inflammation<br>No dysplasia or granuloma seen                                              | Deep glands without significant staining<br>Superficial glands without significant staining                   |
| CD 9  | C | 22 | F | Polypoid colonic mucosal surgical specimen with ulceration, significant acute inflammation, granulation tissue formation, and hyperplastic glands<br>No dysplasia or granuloma seen<br>These features are compatible with an inflammatory type polyp | Deep glands with minimal cytoplasmic staining<br>Surface epithelium with focal patchy 1+ cytoplasmic staining |
| CD 9  | D | 22 | F | Colonic mucosal surgical specimen with no significant histopathologic changes<br>No dysplasia or granuloma seen                                                                                                                                      | Deep glands with 1+ cytoplasmic staining<br>Superficial glands with 2+ subnuclear staining                    |
| CD 10 | A | 72 | F | Colonic mucosal surgical specimen without definite pathologic abnormalities                                                                                                                                                                          | Deep glands without significant staining<br>Superficial glands with 3+ cytoplasmic staining                   |

|       |   |    |   |                                                                                                                                                                                                                           |                                                                                                                                                         |
|-------|---|----|---|---------------------------------------------------------------------------------------------------------------------------------------------------------------------------------------------------------------------------|---------------------------------------------------------------------------------------------------------------------------------------------------------|
| CD 10 | B | 72 | F | Colonic mucosal surgical specimen with mild architectural disarray and focal acute inflammation                                                                                                                           | Deep glands without significant staining<br>Superficial glands with diffuse 3+ cytoplasmic staining                                                     |
| CD 10 | C | 72 | F | Colonic mucosal surgical specimen with architectural disarray and minimal focal acute inflammation                                                                                                                        | Deep glands without significant staining<br>Superficial glands with 2+ cytoplasmic staining                                                             |
| CD 10 | D | 72 | F | Colonic mucosal surgical specimen with architectural disarray and focal acute inflammation                                                                                                                                | Deep glands without significant staining<br>Superficial glands with 1+ to 2+ cytoplasmic staining in areas predominantly subnuclear                     |
| CD 11 | A | 63 | M | Colonic mucosa surgical specimen without significant pathologic abnormalities                                                                                                                                             | 2+ equal supranuclear and subnuclear staining                                                                                                           |
| CD 12 | A | 53 | F | Colonic mucosa surgical specimen without significant pathologic abnormalities                                                                                                                                             | 2+ focal staining supranuclear and subnuclear                                                                                                           |
| CD 13 | A | 33 | M | Colonic mucosal surgical specimen with irregular architecture                                                                                                                                                             | 2+ predominant subnuclear staining                                                                                                                      |
| CD 14 | A | 34 | F | Colonic mucosal surgical specimen with irregular architecture                                                                                                                                                             | Small focus with adequate 3+ staining both supranuclear and subnuclear                                                                                  |
| CD 15 | A | 39 | M | Colonic mucosal surgical specimen without significant pathologic abnormalities                                                                                                                                            | One fragment overstained<br>Other fragment with 2+ to 3+ predominantly subnuclear staining                                                              |
| CD 16 | A | 45 | M | Colonic mucosal surgical specimen with architectural disarray                                                                                                                                                             | Staining pattern more prominent 3+ subnuclear                                                                                                           |
| UC 1  | A | 45 | M | Colonic mucosal surgical specimen with acute inflammation and architectural disarray<br>No dysplasia or granuloma seen                                                                                                    | Deep glands no significant staining<br>Superficial epithelium patchy 2+ subnuclear and perinuclear staining                                             |
| UC 2  | A | 22 | M | Colonic mucosa with focal cryptitis, crypt abscess and expansion of lamina propria with chronic and acute inflammatory cells and lymphoid aggregated<br>Architectural disarray present.<br>No dysplasia or granuloma seen | Deep glands focal 1+ cytoplasmic staining<br>Superficial glands patchy 2+ subnuclear staining<br>Superficial glands other areas 2+ cytoplasmic staining |
| UC 3  | A | 24 | F | Colonic mucosal surgical specimen with no significant histopathologic changes<br>No dysplasia or granuloma seen                                                                                                           | Deep glands no significant staining<br>Superficial epithelium 3+ cytoplasmic staining                                                                   |
| UC 3  | B | 24 | F | Colonic mucosal surgical specimen with ulceration, acute colitis, and crypt architectural disarray                                                                                                                        | Deep glands minimal focal cytoplasmic staining<br>Patchy 2+ to 3+ cytoplasmic staining                                                                  |

|      |   |    |   |                                                                                                                                                                                                                                                       |                                                                                                                             |
|------|---|----|---|-------------------------------------------------------------------------------------------------------------------------------------------------------------------------------------------------------------------------------------------------------|-----------------------------------------------------------------------------------------------------------------------------|
|      |   |    |   | No dysplasia or granuloma seen                                                                                                                                                                                                                        |                                                                                                                             |
| UC 4 | A | 37 | M | Fragments of benign colonic mucosa showing mucosal ulceration with acute inflammation and architectural disarray<br>Expansion of lamina propria by acute and chronic inflammatory cells also noted<br>No evidence of granuloma formation or dysplasia | Deep glands no significant staining<br>Superficial glands 1+ subnuclear staining patchy                                     |
| UC 5 | A | 80 | M | Fragments of benign colonic mucosa showing acute inflammation, cryptitis, crypt abscess formation and architectural disarray<br>No evidence of granuloma formation or dysplasia                                                                       | Deep glands without significant staining<br>Surface epithelium glands with 1+ cytoplasmic staining predominantly subnuclear |
| UC 5 | B | 80 | M | Fragments of benign colonic mucosa showing acute inflammation, cryptitis, crypt abscess formation and architectural disarray<br>No evidence of granuloma formation or dysplasia                                                                       | Deep glands without significant staining<br>Surface epithelium glands with 1+ cytoplasmic staining predominantly subnuclear |
| UC 5 | C | 80 | M | Fragments of benign colonic mucosa showing acute inflammation, cryptitis, crypt abscess formation and architectural disarray<br>No evidence of granuloma formation or dysplasia                                                                       | Deep glands without significant staining<br>Surface epithelium glands with 1+ cytoplasmic staining predominantly subnuclear |
| UC 5 | D | 80 | M | Fragments of benign colonic mucosa showing acute inflammation, cryptitis, crypt abscess formation and architectural disarray<br>No evidence of granuloma formation or dysplasia                                                                       | Deep glands without significant staining<br>Superficial epithelium favor nonspecific staining                               |
| UC 6 | A | 30 | F | Small intestinal mucosa within normal limits                                                                                                                                                                                                          | No definite specific staining                                                                                               |
| UC 6 | B | 30 | F | Colonic mucosal surgical specimen with mild expansion of lamina propria by chronic inflammatory cells<br>No dysplasia or granuloma seen                                                                                                               | Deep glands without definite staining<br>Surface epithelium 1+ cytoplasmic staining                                         |
| UC 6 | C | 30 | F | Colonic mucosal surgical specimen with mild expansion of lamina propria by chronic inflammatory cells<br>No dysplasia or granuloma seen                                                                                                               | Surface epithelium with 2+ cytoplasmic staining in subnuclear predominance                                                  |



|      |   |    |   |                                                                                                                                                                                                                                                                              |                                                                                                                                                       |
|------|---|----|---|------------------------------------------------------------------------------------------------------------------------------------------------------------------------------------------------------------------------------------------------------------------------------|-------------------------------------------------------------------------------------------------------------------------------------------------------|
| UC 7 | A | 50 | M | Colonic mucosa with mild expansion of the lamina propria with acute and chronic inflammatory cells                                                                                                                                                                           | Deep glands without significant staining<br>Superficial epithelium with patchy 1+ cytoplasmic staining                                                |
| UC 7 | B | 50 | M | Colonic mucosa without definite pathologic abnormalities                                                                                                                                                                                                                     | Deep glands without significant staining<br>Superficial epithelium with 2+ subnuclear staining                                                        |
| UC 8 | A | 27 | F | Fragments of benign colonic mucosa showing no significant histopathological changes                                                                                                                                                                                          | Deep glands without significant staining<br>Superficial glands with 1+ diffuse cytoplasmic staining                                                   |
| UC 8 | B | 27 | F | Fragments of benign colonic mucosa showing architectural disarray<br>No evidence of acute inflammation, granuloma formation or dysplasia.<br>Paneth cell metaplasia present                                                                                                  | Deep glands without significant staining<br>Superficial glands without significant staining<br>Superficial glands with patchy 2+ cytoplasmic staining |
| UC 8 | C | 27 | F | Fragments of benign colonic mucosa showing acute inflammation and architectural disarray<br>Mild expansion of the lamina propria by acute and chronic inflammatory cells also noted<br>No evidence of granuloma formation or dysplasia<br>Immunostaining for CMV is negative | Deep glands without significant staining<br>Superficial glands with patchy 1+ diffuse and subnuclear staining                                         |
| UC 8 | D | 27 | F | Fragments of benign colonic mucosa showing acute inflammation and architectural disarray<br>Mild expansion of the lamina propria by acute and chronic inflammatory cells also noted<br>No evidence of granuloma formation or dysplasia                                       | Deep glands without definite staining<br>Superficial epithelium with 1+ predominantly subnuclear staining                                             |
| UC 9 | A | 53 | M | Adenomatous polyp, see note<br>Three separate fragments of benign unremarkable colonic mucosa also present<br>Note: In cases of established inflammatory bowel disease, a dysplastic polyp raises the differential diagnosis of a DALM                                       | Deep glands minimal cytoplasmic staining<br>Superficial glands with 3+ supranuclear staining                                                          |
| UC 9 | B | 53 | M | Fragments of benign colonic mucosa containing prominent intramucosal lymphoid nodules showing no significant histopathological changes                                                                                                                                       | Deep glands minimal 1+ cytoplasmic staining<br>Superficial glands with patchy 3+ partly subnuclear staining                                           |

|       |   |    |   |                                                                                                                                                                                                                                   |                                                                                                                |
|-------|---|----|---|-----------------------------------------------------------------------------------------------------------------------------------------------------------------------------------------------------------------------------------|----------------------------------------------------------------------------------------------------------------|
| UC 9  | C | 53 | M | Fragments of benign colonic mucosa showing no significant histopathological changes                                                                                                                                               | Deep glands without significant staining<br>Superficial glands with 2+ to 3+ predominantly subnuclear staining |
| UC 9  | D | 53 | M | Fragments of benign colonic mucosa showing acute inflammation and architectural disarray<br>Expansion of the lamina propria by acute and chronic inflammatory cells also noted<br>No evidence of granuloma formation or dysplasia | Deep glands without significant staining<br>Superficial epithelium with diffuse 1+ cytoplasmic staining        |
| UC 10 | A | 48 | M | Colonic mucosal surgical specimen with focal hyperplastic changes                                                                                                                                                                 | Staining only identified and surface glands<br>Superficial glands 3+ supranuclear and subnuclear               |
